# Supplementary material for: Determination of boron isotopic compositions in five fractions of soil boron: traces of the environmental behavior of boron in soil
Source: Royal Society of Chemistry journal article supplement (doi:10.1039/d4ja00286e), 2024-01-01
Supplement: d4ja00286e1.pdf [file d4ja00286e1.pdf]

## Determination of boron isotopic compositions in five fractions of soil boron: Traces of the environmental behavior of boron in soil

Xuejun Chen <sup>a</sup>, Qingcai Xu <sup>a</sup>, Li Yan <sup>a</sup>, Xiaodong Hao <sup>a</sup>, Xiaochen Guan <sup>a,b</sup>, Xiaopeng Han <sup>a,b</sup>, Aide Sun<sup>a,\*</sup>, Zhiqun Chen <sup>a,b,\*</sup>, Lihua Liu <sup>a,\*</sup>, Zihao Zhu <sup>a</sup>

<sup>a</sup>Shandong Provincial Key Laboratory of Water and Soil Conservation and Environmental Protection, College of Resource and Environment, Linyi University, Linyi 276005, China. Email: [Aide Sun] adsun1977@163.com, [Zhiqun Chen] chenzhiquan@lyu.edu.cn. [Lihua Liu] liulihua@lyu.edu.cn

<sup>b</sup>College of Horticulture, China Agricultural University, Beijing 100193, China

Table S1 Operation conditions of the ICP-MS for the determination of boron content

| Parameter                       | values   | Parameter              | values     |
|---------------------------------|----------|------------------------|------------|
| Analysis chamber vacuum         | 76 Pa    | Power                  | 1.55 W     |
| Atomization chamber temperature | 2.7 °C   | Peristaltic pump speed | 40 r/min   |
| Cooling gas flow                | 14 L/min | Auxiliary gas flow     | 0.80 L/min |
| Sampling depth                  | 5.0 mm   | Atomizer flow          | 1.1 L/min  |
| Test time                       | 70 s     |                        |            |

Table S2 Operation conditions of the MC-ICP-MS for the measurement of boron isotope in soil

| Parameter               | Value     | Parameter             | Value     |
|-------------------------|-----------|-----------------------|-----------|
| RF power                | 1310 W    | Cooling gas flow rate | 16 L/min  |
| Auxiliary gas flow rate | 1.0 L/min | Sample gas flow rate  | 1.0 L/min |
| Extraction voltage      | -2000 V   | Acceleration voltage  | 10 kV     |
| Idle time               | 3 s       | Integration time      | 4.2 s     |
